# Supplementary material for: Genome-wide analysis of the potato Hsp20 gene family: identification, genomic organization and expression profiles in response to heat stress
Source: BMC Genomics. 2018 Jan 18;19:61. doi: 10.1186/s12864-018-4443-1 (PMC5774091; doi:10.1186/s12864-018-4443-1)
Supplement: Supplementary file 2 — FPKM values of 48 StHsp20 genes in various potato tissues. (XLSX 15 kb) [file 12864_2018_4443_MOESM2_ESM.xlsx]

## Sheet: Sheet1
	Leaves	Roots	Shoots	Callus	Tubers	Sepals	Stamens	Stolons	Flowers	Petioles	Petals	Carpels
StHsp20-1	0	1.44455	4.22086	1.37106	1.306	0.304665	0	1.02621	0.287579	1.80155	0	0.80911
StHsp20-2	0	0	0.138827	0	0	0	0	0	0	0	0	0
StHsp20-3	0	0.243441	0.924291	0	0.0438567	0	0	1.40521	0.0658965	1.55154	0	0.158197
StHsp20-4	6.41085	5.59138	6.37696	15.7439	32.8853	1.06549	0.0890947	0.460602	0.976846	0.731809	1.96817	2.54671
StHsp20-5	7.49353	16.8444	15.77	5.86059	3.61435	13.3504	46.318	7.7005	20.538	2.1893	15.503	10.6132
StHsp20-6	0.991284	0.713238	1.47907	8.54869	9.18137	0.148278	0	0.432728	0.180251	0.0735645	0	0.443011
StHsp20-7	0.0629414	0.456945	0.188613	1.37939	0.539233	0.209077	0.310562	0.130362	0.469732	0.230423	0.222635	0.485058
StHsp20-8	0	0.0887375	0.577571	0.544796	0.114413	0	0	0	0	0.0662515	0	0
StHsp20-9	1.30845	0.299566	0.162691	5.28868	0.579531	0.0978597	0	0	0.079781	0.074647	0.301275	0
StHsp20-10	19.0944	17.1208	7.61529	18.0782	142.238	18.9475	9.78517	2.93983	26.1514	10.1341	27.3388	170.064
StHsp20-11	31.5462	23.7977	46.81	54.9375	23.6316	16.1518	17.7644	21.6868	17.5485	25.8588	14.3353	38.2576
StHsp20-12	0	0.104604	0.894241	0.224115	0.207354	0	0	0.371185	0.12564	0.60878	0	0
StHsp20-13	0	2.5568	1.46439	0	0	0.160152	0.133916	0.090554	0.164937	0.109996	0	0
StHsp20-14	13.0649	28.4387	17.0103	19.9855	25.6407	17.99	9.33915	12.7974	12.868	12.7593	14.1924	17.0951
StHsp20-15	10.1765	22.8295	27.394	21.4227	13.4482	21.5308	13.319	15.8812	18.2709	13.286	15.2186	19.3639
StHsp20-16	4.20696	2.09625	4.84628	3.19457	28.4394	1.68426	0	0.567147	0.709674	0.479469	0	0.51611
StHsp20-17	16.0249	5.39175	7.83188	17.3791	133.671	4.82272	9.52144	7.64694	8.77845	6.4142	5.21215	22.8809
StHsp20-18	45.5347	140.916	77.303	162.212	278.744	89.8135	52.6355	34.9191	101.133	143.011	113.138	144.088
StHsp20-19	15.7766	14.4514	12.0868	54.5952	293.198	1.85541	3.38775	3.56543	3.99859	5.97975	3.3074	6.69087
StHsp20-20	12.6532	19.0641	16.1256	43.7155	151.231	17.401	10.8696	11.7467	12.2855	23.3915	21.1588	23.1739
StHsp20-21	4.24298	15.8571	15.832	27.7401	161.458	7.5575	2.51112	6.43177	4.26571	6.50037	10.5772	9.17693
StHsp20-22	139.96	5.16153	24.787	1.02323	0.035018	5.99379	0	0.256919	7.18943	5.78532	0	0
StHsp20-23	5.27623	3.80798	6.93347	1.95706	2.62319	4.54966	2.26449	0.978044	5.75732	6.40986	3.66845	2.15763
StHsp20-24	47.4688	17.6116	35.2291	60.6638	249.154	14.3119	14.0083	52.3936	17.5553	40.4852	34.156	75.2438
StHsp20-25	92.7323	33.0958	35.8046	78.0185	303.693	36.016	27.7759	71.9805	59.3727	81.6809	63.6814	132.931
StHsp20-26	101.812	72.3863	59.3382	231.612	207.019	57.0321	23.134	50.8196	42.2309	51.6559	47.6745	217.132
StHsp20-27	1.92974	1.04621	1.84755	3.92614	1.88156	0.202057	1.1827	1.23465	0.494158	1.13309	0	0.201229
StHsp20-28	12.0142	13.3888	10.5875	6.74347	4.2471	2.51594	0.657432	6.37882	3.17787	11.4169	0.968211	4.22825
StHsp20-29	68.5693	46.4045	99.5102	56.6392	37.249	79.6568	20.728	90.187	83.0703	90.3371	149.84	47.5681
StHsp20-30	311.572	99.648	159.025	57.4676	190.314	232.98	37.7329	344.553	110.032	360.025	170.483	51.82
StHsp20-31	1.34397	2.17514	6.25824	1.50141	1.50285	0.501893	0	2.76851	0.943006	3.33217	0.965719	1.40146
StHsp20-32	7.41361	7.4792	28.4361	29.2864	76.6101	10.568	3.87968	2.91038	4.97265	2.59515	0.777355	8.49428
StHsp20-33	5.79222	1.28545	3.96708	17.8655	14.9187	0.889995	0.507133	0.404095	0.623626	0.40191	1.25514	1.34901
StHsp20-34	12.2195	8.7675	16.0976	86.8333	84.8379	9.09079	5.64922	3.65287	12.7708	1.74826	8.31899	12.4369
StHsp20-35	9.80012	2.82502	6.15946	38.1698	35.3627	1.74493	0.833759	1.24874	1.36389	1.21136	3.0999	1.56438
StHsp20-36	1.00679	0.194262	3.33759	2.1301	13.2939	0.803032	7.48495	0.198481	2.66481	0.465977	3.03945	2.56047
StHsp20-37	0	0	0.701649	0.943692	0.268997	2.19464	1.97628	0	0.207658	0	0.519732	1.34501
StHsp20-38	0	0	0.182114	0	0.157058	0.219085	0	0.865156	0.891468	0	0	0.654561
StHsp20-39	0.127113	2.03707	0.221271	0.329647	0.724843	3.06121	1.78068	0.500104	9.23257	0.116794	0.81951	3.57886
StHsp20-40	0	2.7259	4.8024	1.05834	0.69427	0	0	2.89461	0.183325	2.08702	0	0.359604
StHsp20-41	5.93481	0.388205	0.948767	23.6874	87.3016	0.507279	0.212089	1.00161	0.10522	0.048369	1.95217	0.631501
StHsp20-42	0	0.216032	0.208458	0.252912	0.112071	0.204901	0	0.473232	0.253231	0.151583	0.28415	0.687627
StHsp20-43	4.19932	11.6011	10.3558	44.4143	101.916	3.2454	0.78786	3.39934	2.28249	2.22103	1.28922	2.29375
StHsp20-44	13.7516	70.9537	57.8504	179.48	531.574	15.8988	4.01337	40.3588	11.0134	31.2666	9.23523	11.0537
StHsp20-45	0	0	0	0	0	0	0	0	0	0	0	0
StHsp20-46	5.2699	0.881688	1.85236	14.9808	19.1329	0.212229	0	1.45165	0.585859	0.473652	0.980067	1.16248
StHsp20-47	0.135927	1.61903	2.36615	1.63321	7.40049	2.41953	1.66614	4.49108	1.09713	0.809162	0	1.84264
StHsp20-48	0	0	0.535805	0.0988485	0	0	0	0.0911155	0.23048	0.2336	0	0.320969
